# Supplementary material for: Development and characterization of potential larvicidal nanoemulsions against Aedes aegypti
Source: publisher site journal article supplement (doi:10.3762/bjnano.15.10), 2024-01-18
Supplement: Additional file 1 [file 2190-4286-15-10-S1.pdf]

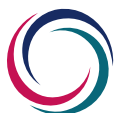

## Supporting Information

for

### **Development and characterization of potential larvicidal nanoemulsions against *Aedes aegypti***

Jonatas L. Duarte, Leonardo Delello Di Filippo, Anna Eliza Maciel de Faria Mota Oliveira, Rafael Miguel Sábio, Gabriel Davi Marena, Tais Maria Bauab, Cristiane Duque, Vincent Corbel and Marlus Chorilli

*Beilstein J. Nanotechnol.* **2024**, *15*, 104–114. [doi:10.3762/bjnano.15.10](https://doi.org/10.3762/bjnano.15.10)

### **Additional details on experimental methods and results**

## Material and methods

**Table S1:** Variations in surfactant fractions to obtain different values of HLB.

| rHLB | Span 80 (g) | Tween 20 (g) | Terpene (g) | Water (g) | Total (g) |
|------|-------------|--------------|-------------|-----------|-----------|
| 10   | 0.27        | 0.23         | 0.5         | 9         | 10        |
| 11   | 0.23        | 0.27         | 0.5         | 9         | 10        |
| 12   | 0.19        | 0.31         | 0.5         | 9         | 10        |
| 13   | 0.15        | 0.35         | 0.5         | 9         | 10        |
| 14   | 0.11        | 0.39         | 0.5         | 9         | 10        |
| 15   | 0.07        | 0.43         | 0.5         | 9         | 10        |
| 16   | 0.03        | 0.47         | 0.5         | 9         | 10        |
| 16.7 | —           | 0.5          | 0.5         | 9         | 10        |

## Results

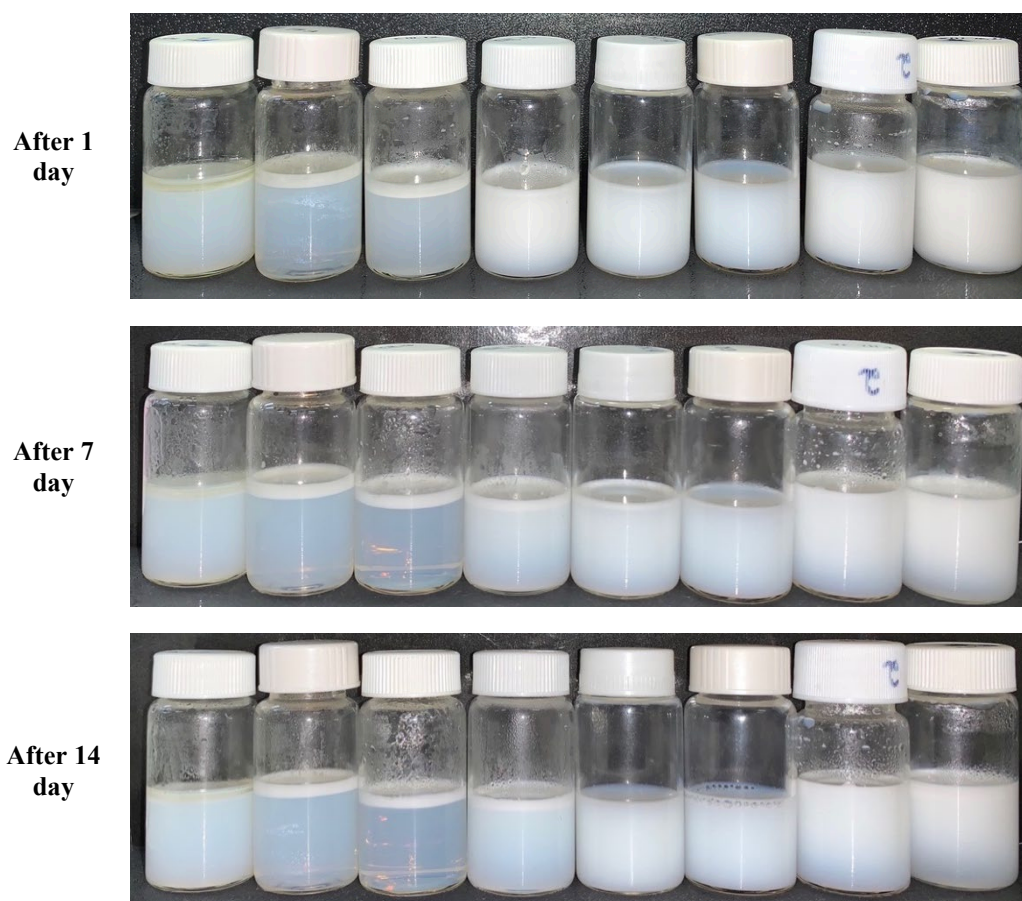

**Figure S1:** Visual appearance of Cym-NE on the HLB scale from 10 to 16.7.

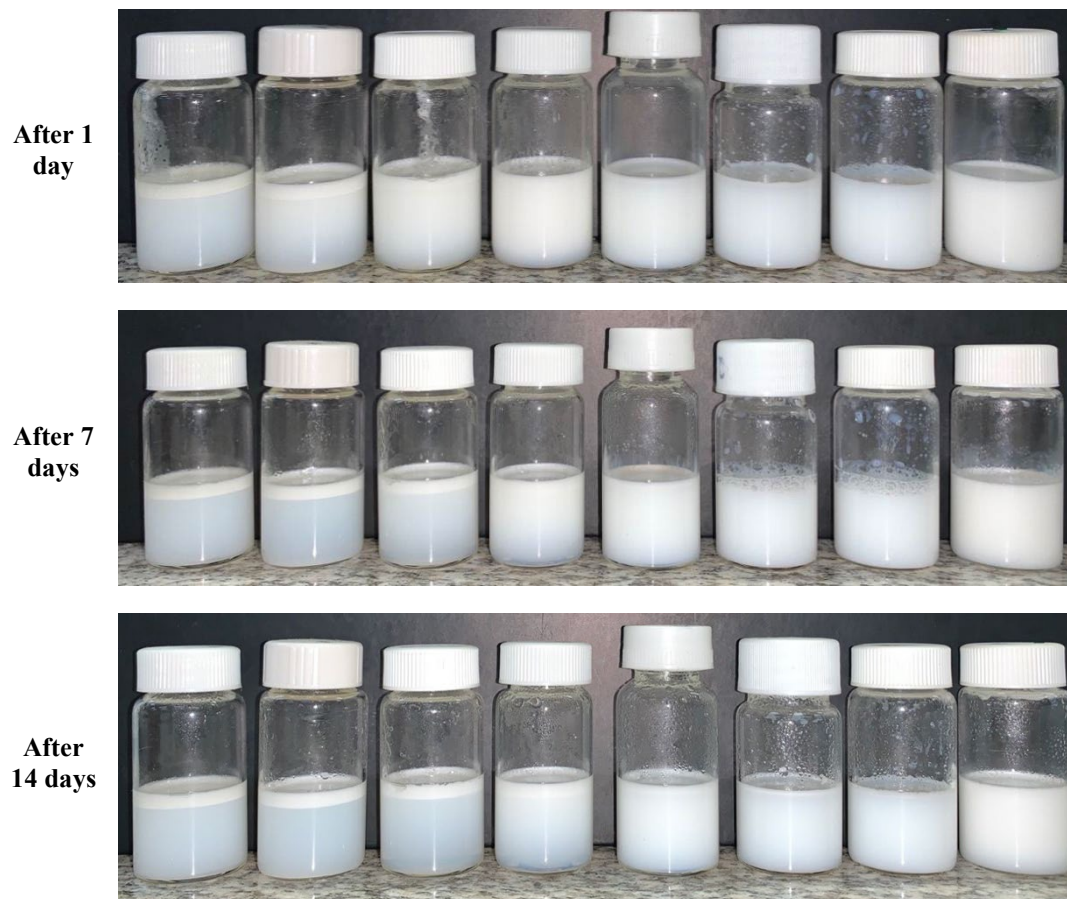

**Figure 2:** Visual appearance of Myr-NE on the HLB scale from 10 to 16.7.
